# Supplementary material
Source: Springer Nature journal article supplement (https://www.springermedizin.de/resource/supplementary/12967_2012_1341_MOESM7_ESM.pdf/9573270)
Supplement: MOESM7 [file 9573270]

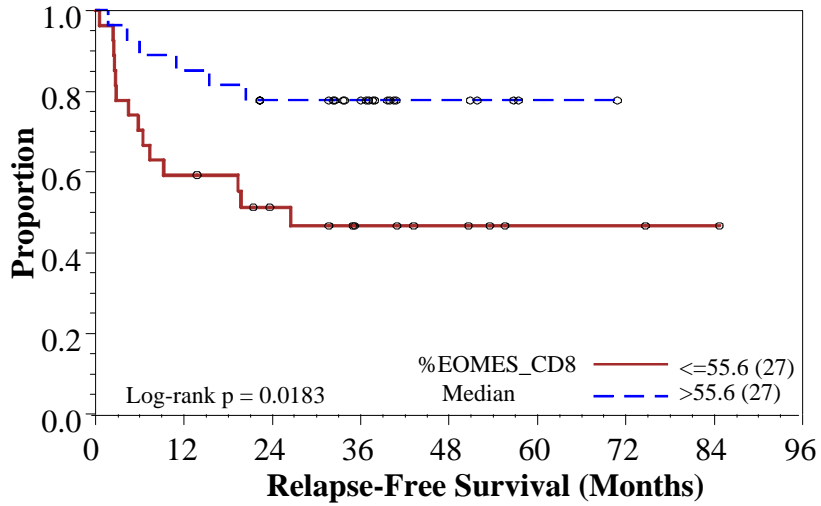

Figure 1a.

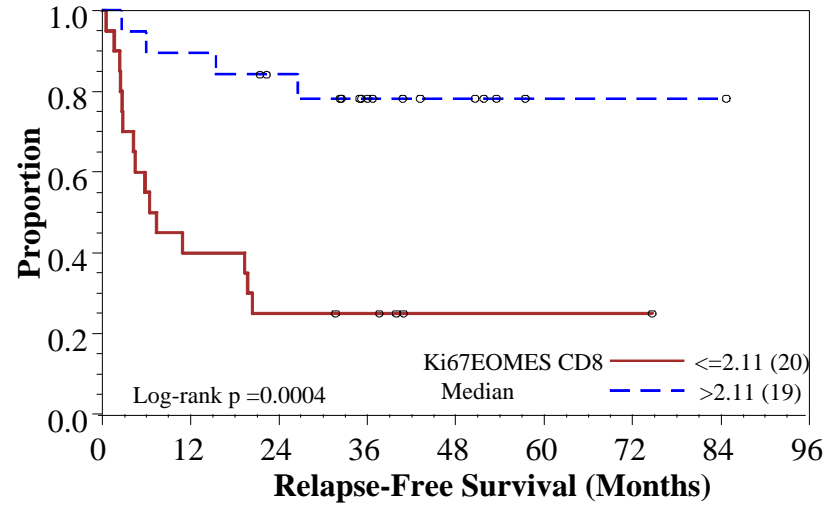

Figure 1b.

Figure 1 Kaplan-Meier curves for association of baseline biomarkers with relapse free survival
